# Supplementary material for: Multi-dose Romidepsin Reactivates Replication Competent SIV in Post-antiretroviral Rhesus Macaque Controllers
Source: PubMed Central journal article supplement (PMC5025140; doi:10.1371/journal.ppat.1005879), 2016-09-15

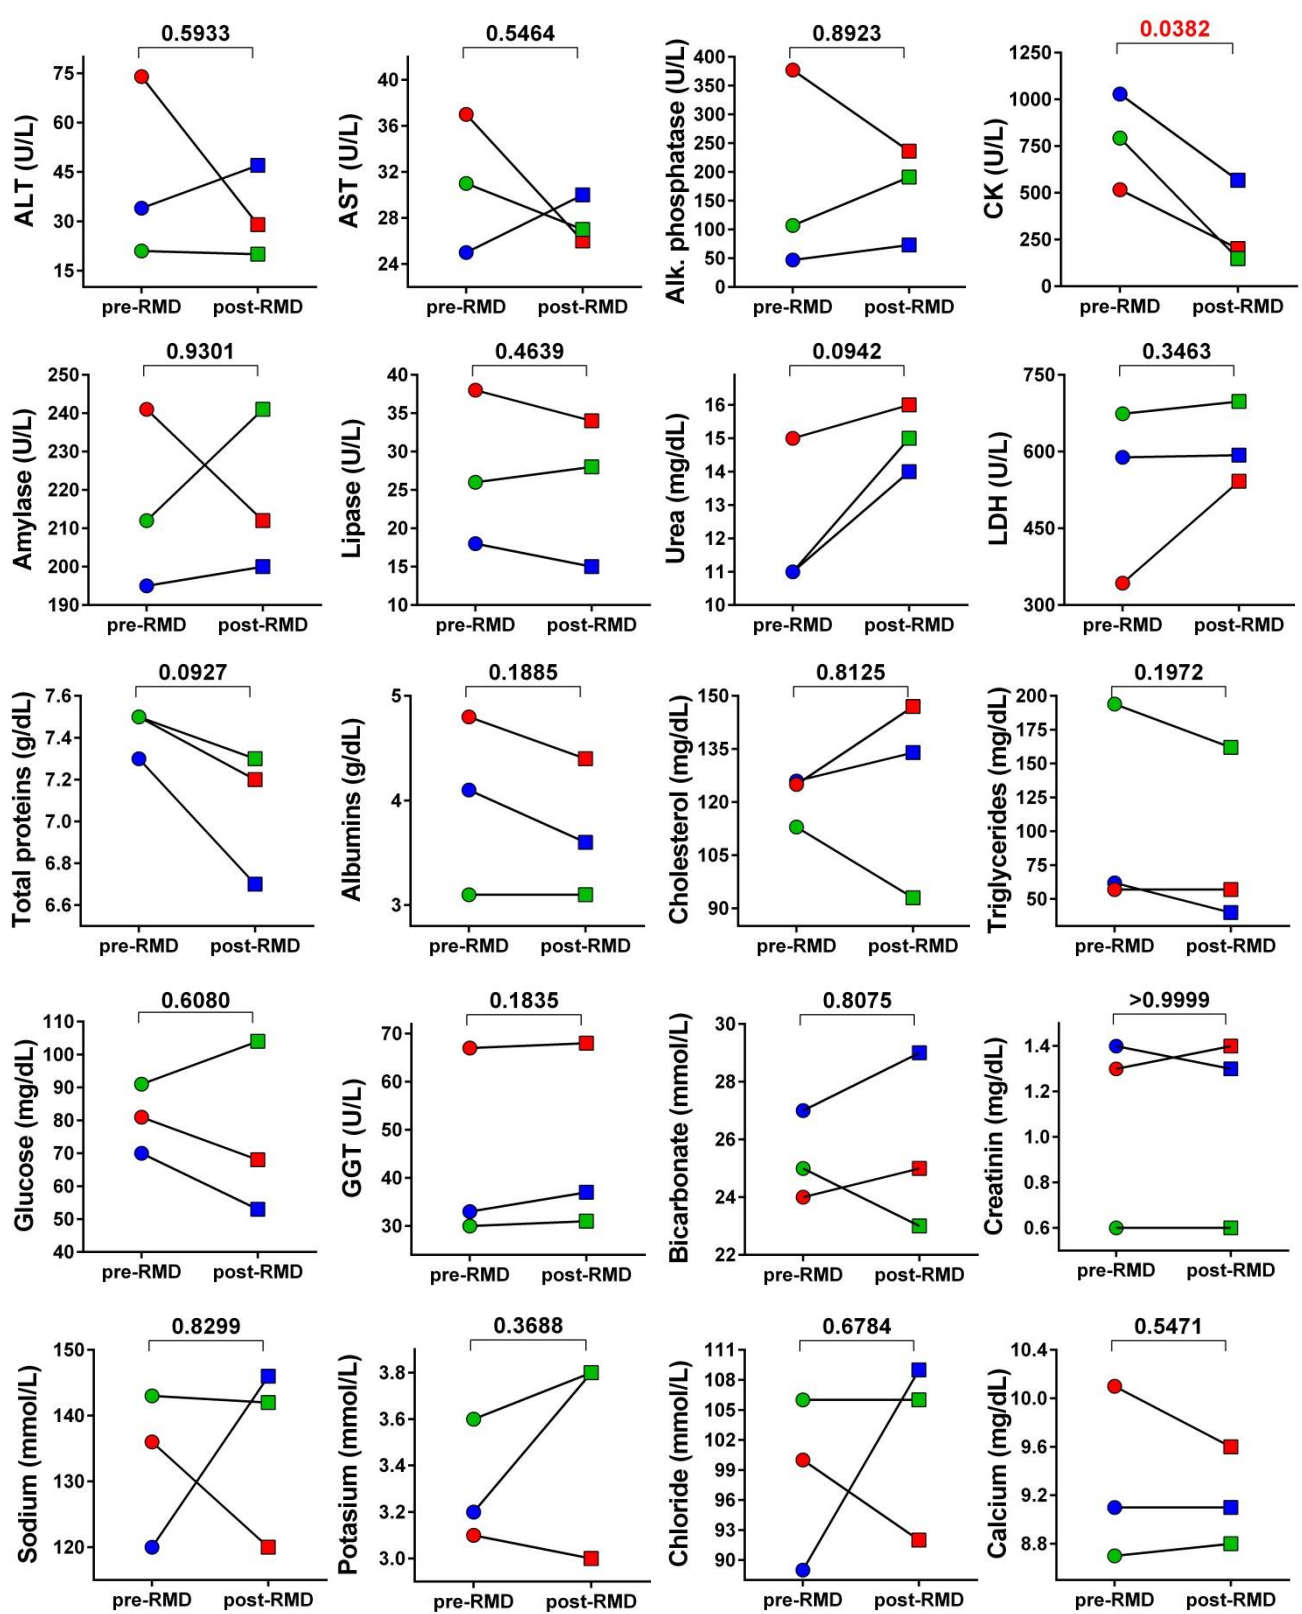

Supplement: ppat.1005879.s001.pdf [file ppat.1005879.s001.pdf]
