# Supplementary material for: Multi-dose Romidepsin Reactivates Replication Competent SIV in Post-antiretroviral Rhesus Macaque Controllers
Source: PubMed Central journal article supplement (PMC5025140; doi:10.1371/journal.ppat.1005879), 2016-09-15

## RM135 RMD #1

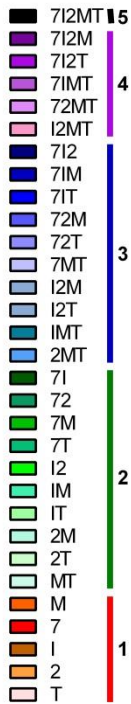

### SIV-specific CD4<sup>+</sup> T cells

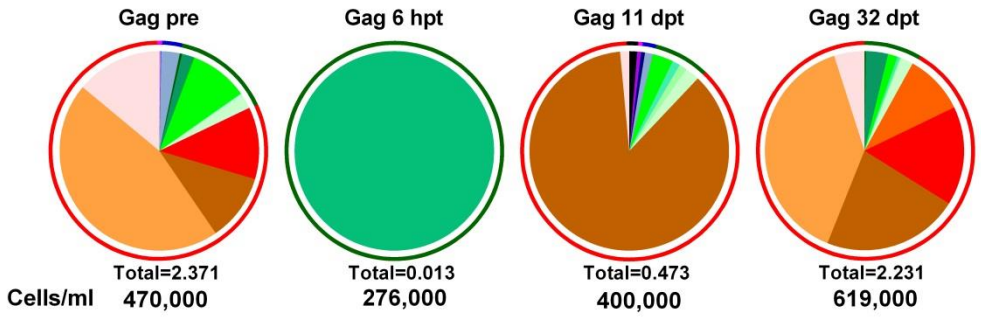

### SIV-specific CD8<sup>+</sup> T cells

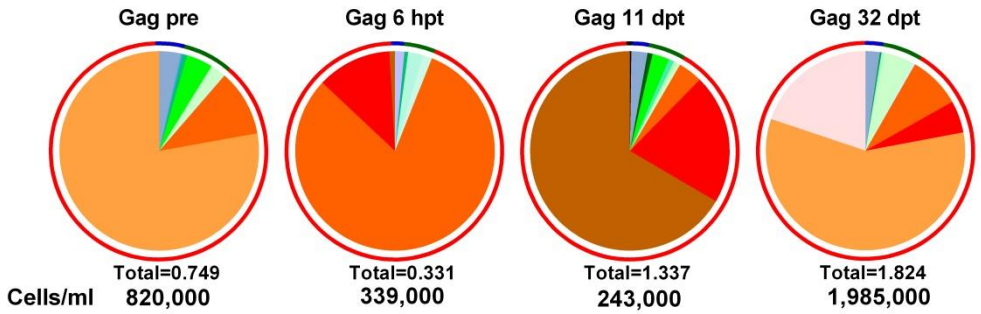

## RM135 RMD #2

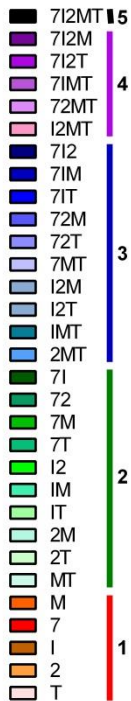

### SIV-specific CD4<sup>+</sup> T cells

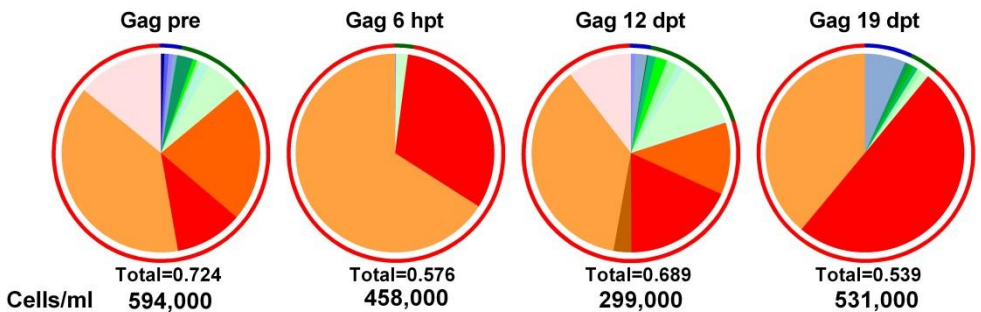

### SIV-specific CD8<sup>+</sup> T cells

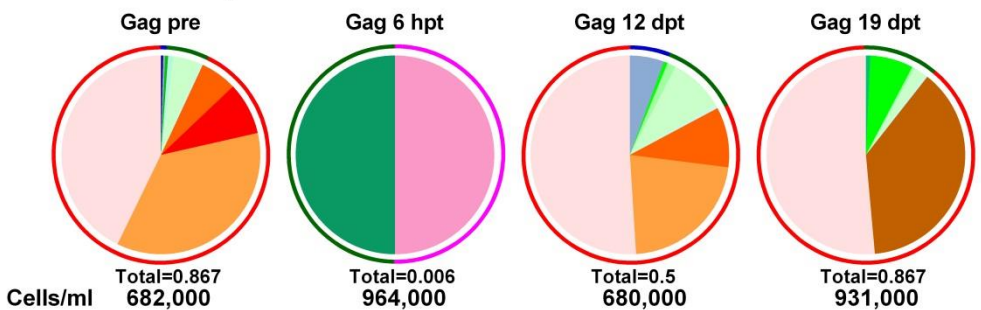

## RM135 RMD #1

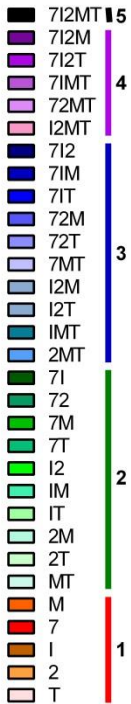

### SIV-specific CD4<sup>+</sup> T cells

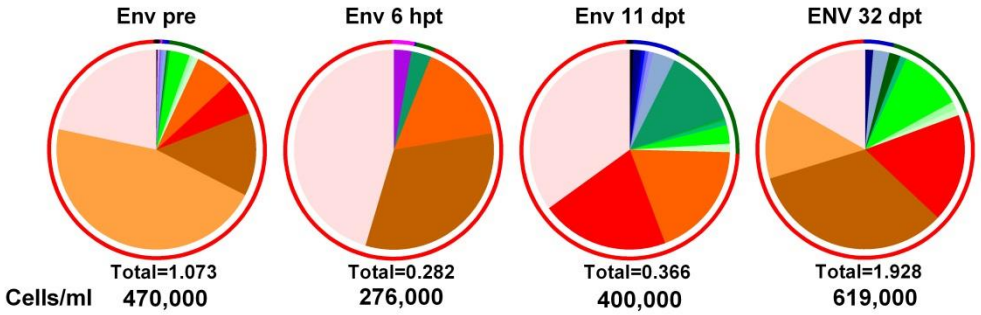

### SIV-specific CD8<sup>+</sup> T cells

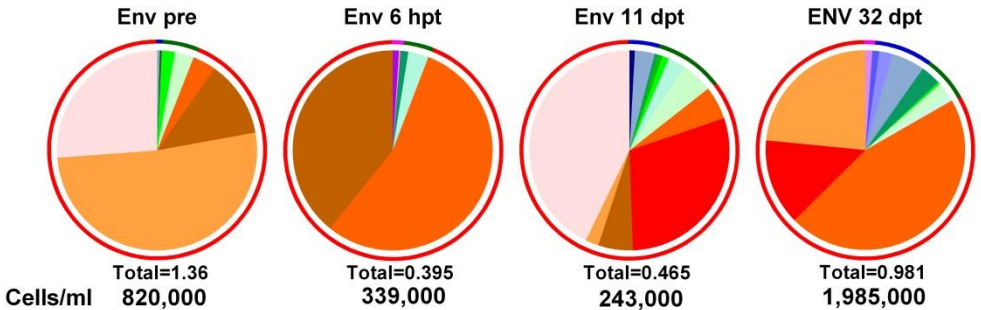

## RM135 RMD #2

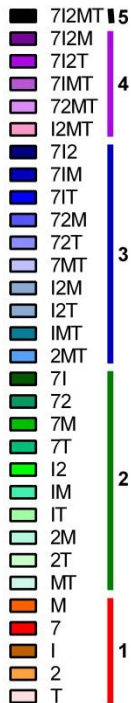

### SIV-specific CD4<sup>+</sup> T cells

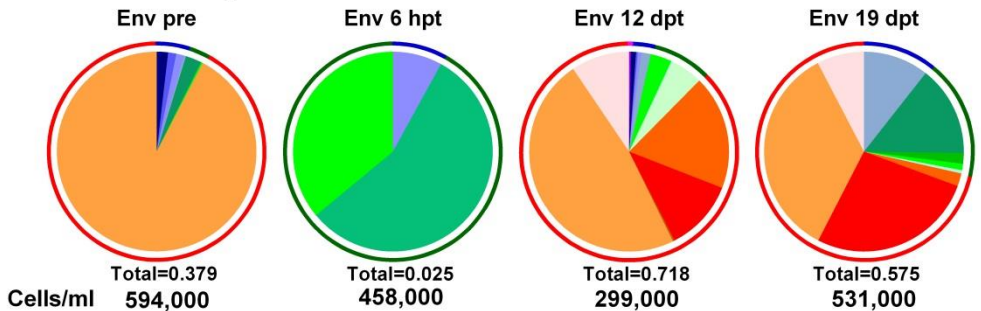

### SIV-specific CD8<sup>+</sup> T cells

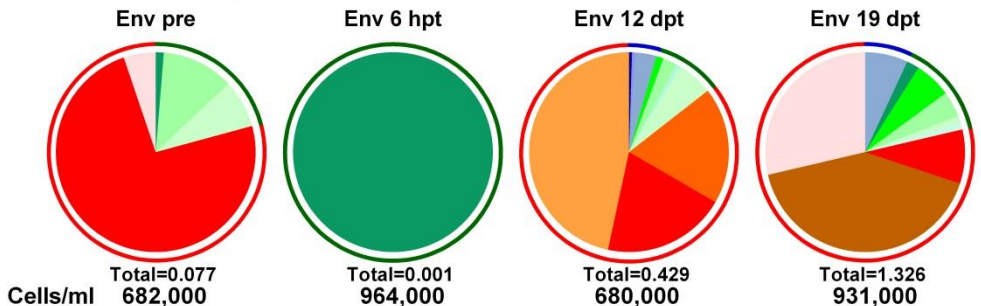

Supplement: ppat.1005879.s005.pdf [file ppat.1005879.s005.pdf]
